# Supplementary material for: Single Molecule Real-Time Sequencing and Traditional Cultivation Techniques Reveal Complex Community Structures and Regional Variations of Psychrotrophic Bacteria in Raw Milk
Source: Frontiers journal article supplement (doi:10.3389/fmicb.2022.853263), 2022-02-10
Supplement: Table_1.DOCX [file Table_1.DOCX]

**Table 1**  Primer sequences used in the study

| Gene | Primers (5′ to 3′) | Reference |
| --- | --- | --- |
| 16S rRNA | AGAGTTTGATCCTGGCTCAG | Scarpellini et al.[13] |
| CTACGGCTACCTTGTTACGA |
| *rpo*D | ATYGAAATCGCCAARCG | Rajwar et al.[14] |
| CGGTTGATKTCCTTGA |
| *apr*X | AAATCGATAGCTTCAGCCAT | Caldera et al.[15] |
| TTGAGGTTGATCTTCTGGTT |
