# Supplementary material for: Single Molecule Real-Time Sequencing and Traditional Cultivation Techniques Reveal Complex Community Structures and Regional Variations of Psychrotrophic Bacteria in Raw Milk
Source: Frontiers journal article supplement (doi:10.3389/fmicb.2022.853263), 2022-02-10
Supplement: Table_2.DOCX [file Table_2.DOCX]

**Table 2**  Identification and distribution of psychrotrophic bacteria isolated from raw milk samples collected from different regions in China

| Genus (Total No. ) | Species (No. ) | Genus (Total No.) | Species (No.) |
| --- | --- | --- | --- |
| *Pseudomonas*(146) | *Azotoformans* (42) | *Chryseobacterium* (12) | *hominis*(8) |
|  | *Paralactis* (19) |  | *lactis*(2) |
|  | *lactis*(13) |  | *cucumeris*(1) |
|  | *marginalis*(10) |  | *haifense*(1) |
|  | *helmanticensis*(9) | *Serratia*(9) | *marcescens*(7) |
|  | hibiscicola(8) |  | *surfactantfaciens*(2) |
|  | *gessardii*(7) | *Bacillus*(8) | *galactosidilyticus*(6) |
|  | *oryzihabitans*(5) |  | *licheniformis*(1) |
|  | *mucidolens*(4) |  | *kochii*(1) |
|  | *lundensis*(3) | *Moraxella*(8) | *osloensis*(8) |
|  | *fluorescens*(3) | *Lactococcus*(5) | *raffinolactis*(2) |
|  | *reinekei*(3) |  | *lactis*(2) |
|  | *koreensis*(3) |  | *garvieae*(1) |
|  | *canadensis*(3) | *Rothia*(5) | *endophytica*(5) |
|  | *lurida*(3) | *Comamonas*(3) | *testosteroni*(3) |
|  | *weihenstephanensis*(2) | *Citrobacter*(3) | *freundii*(3) |
|  | *rhodesiae*(1) | *Staphylococcus*(3) | *xylosus*(2) |
|  | *synxantha*(1) |  | *gallinarum*(1) |
|  | *kilonensis*(1) | *Macrococcus*(3) | *goetzii*(2) |
|  | *coleopterorum*(1) |  | *caseolyticus*(1) |
|  | *poae*(1) | *Acinetobacter*(2) | *baumannii*(2) |
|  | *fildesensis*(1) | *Enterobacter*(1) | *bugandensis*(1) |
|  | *tolaasii*(1) | *Psychrobacter*(1) | *faecalis*(1) |
|  | *baetica*(1) | *Sporosarcina*(1) | *luteola*(1) |
|  | *orientalis*(1) | *Streptococcus*(1) | *suis*(1) |
| *Stenotrophomonas*(18) | *maltophilia*(9) | *Kocuria* (1) | *arsenatis*(1) |
|  | *pavanii*(6) | *Galactobacter*(1) | *valiniphilus*(1) |
|  | *rhizophila*(3) | *Pantoea*(1) | *agglomerans*(1) |
| *Enterococcus*(16) | *faecalis*(12) |  |  |
|  | *pseudoavium*(3) |  |  |
|  | *hirae*(1) |  |  |
